# Supplementary material for: Structural basis of leukotriene B4 receptor 1 activation
Source: PubMed Central journal article supplement (PMC8894450; doi:10.1038/s41467-022-28820-9), 2022-03-03
Supplement: 41467_2022_28820_MOESM3_ESM.pdf [file 41467_2022_28820_MOESM3_ESM.pdf]

**Description of additional Supplementary data files**

Supplementary Movie 1. Movie track of LTB4-bound BLT1 receptor in MD simulation.
